# Supplementary material for: Synthesis, photophysics and reverse saturable absorption of bipyridyl platinum(ii) bis(arylfluorenylacetylide) complexes
Source: Royal Society of Chemistry journal article supplement (doi:10.1039/c2dt32153j), 2012-12-13
Supplement: c2dt32153j.pdf [file c2dt32153j.pdf]

## Supporting Information

### Synthesis, Photophysics and Reverse Saturable Absorption of Bipyridyl Platinum(II) Bis(arylfluorenylacetylide) Complexes

Rui Liu, Naveen Dandu, Yuhao Li, Svetlana Kilina, Wenfang Sun\*

*<sup>a</sup>Department of Chemistry and Biochemistry, North Dakota State University, Fargo,  
North Dakota 58108-6050, USA.*

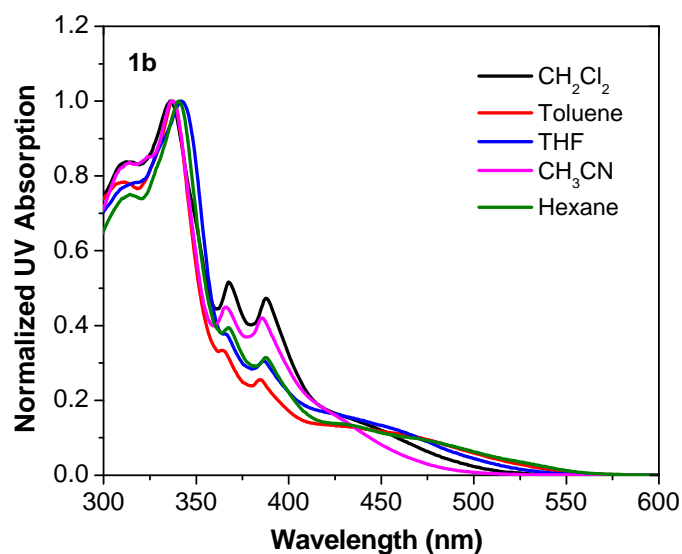

**Figure S1.** Normalized UV-Vis absorption spectra of **1b** in different solvents.  $A_{436} = 0.08$  in a 1 cm cuvette.

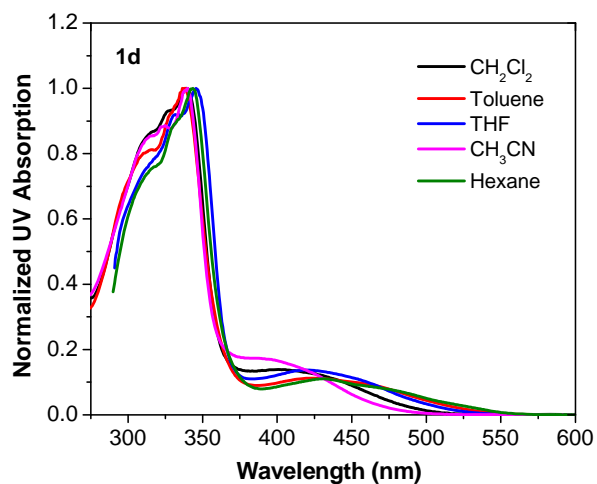

**Figure S2.** Normalized UV-Vis absorption spectra of **1d** in different solvents.  $A_{436} = 0.08$  in a 1 cm cuvette.

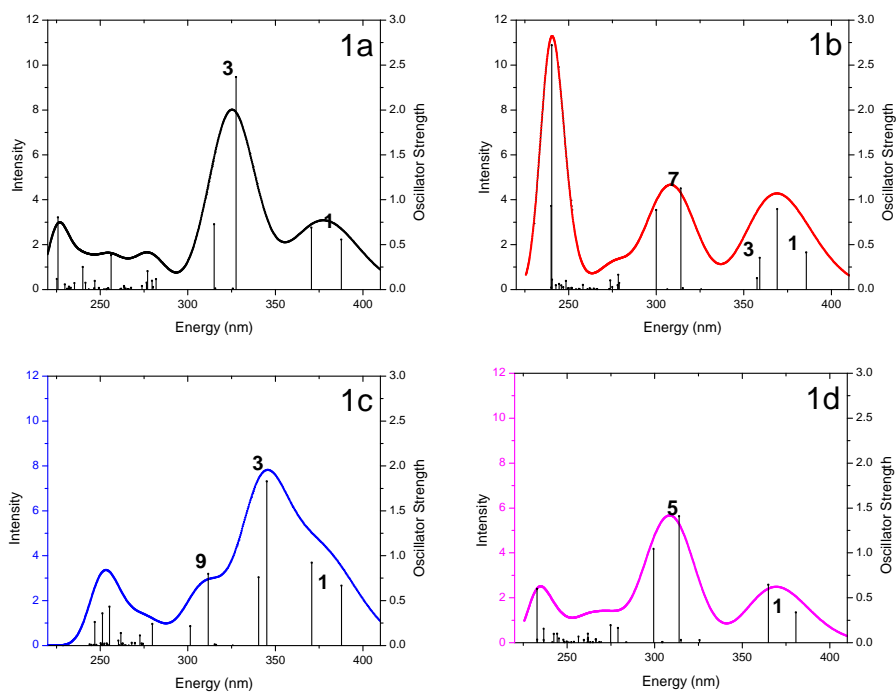

**Figure S3.** Calculated absorption spectra for complexes **1a** – **1d**; vertical lines represent excited states and the corresponding oscillator strength. Labeled numbers represent the states whose NTO's are shown in Tables 2 and 3.

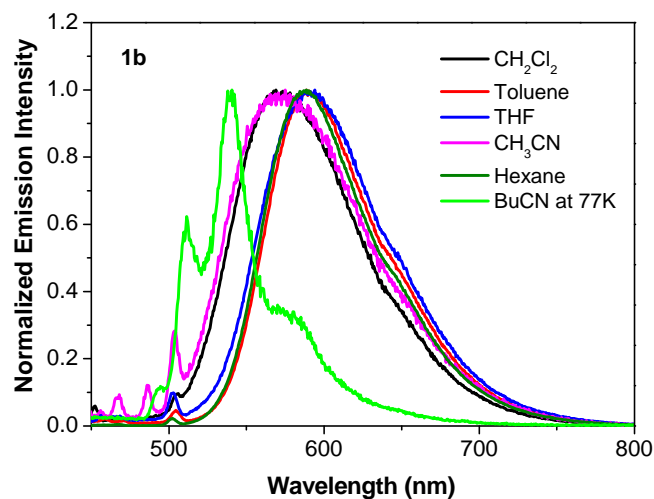

**Figure S4.** Normalized emission spectra of **1b** in different solvents at room temperature and in BuCN glassy matrix at 77 K,  $\lambda_{\text{ex}} = 436$  nm.

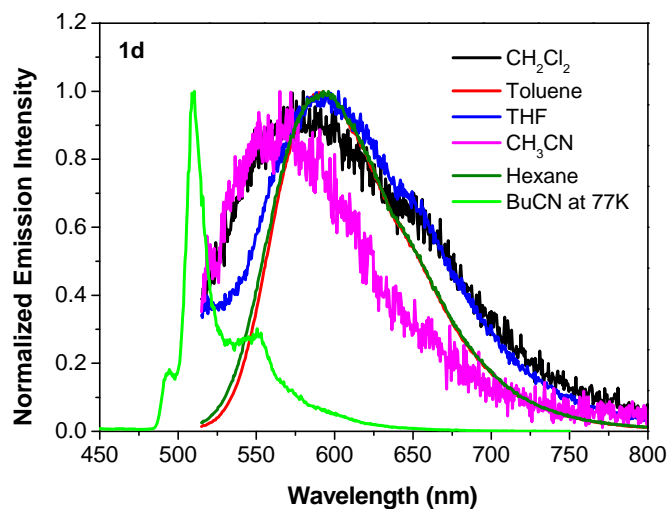

**Figure S5.** Normalized emission spectra of **1d** in different solvents at room temperature and in BuCN glassy matrix at 77 K,  $\lambda_{\text{ex}} = 436$  nm.

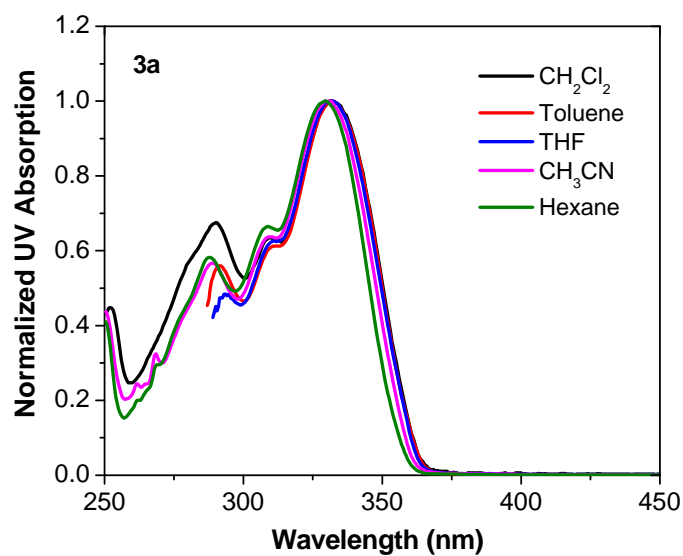

**Figure S6.** Normalized UV-Vis absorption spectra of **3a** in different solvents.  $A_{365} = 0.08$

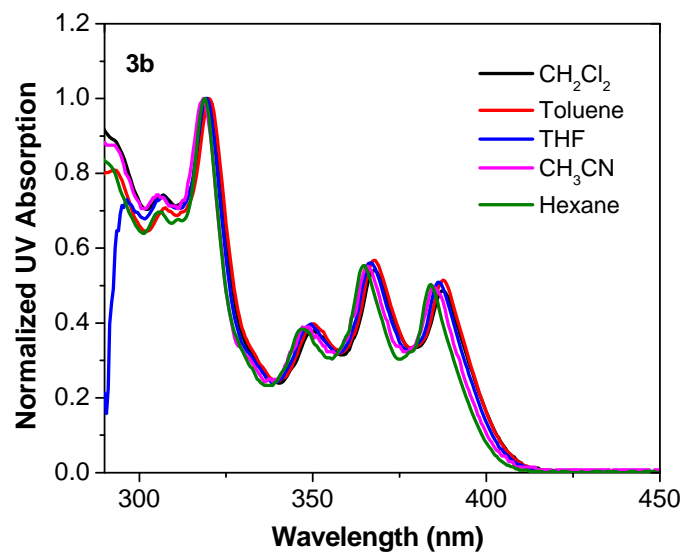

**Figure S7.** Normalized UV-Vis absorption spectra of **3b** in different solvents.  $A_{365} = 0.08$

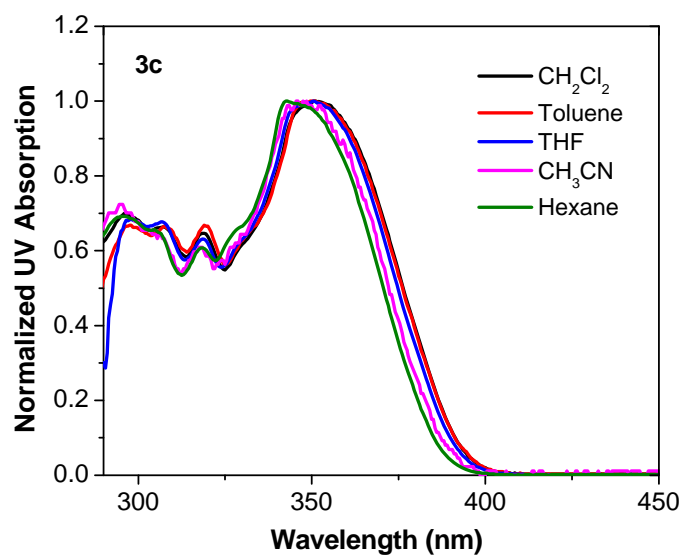

**Figure S8.** Normalized UV-Vis absorption spectra of **3c** in different solvents.  $A_{365} = 0.08$

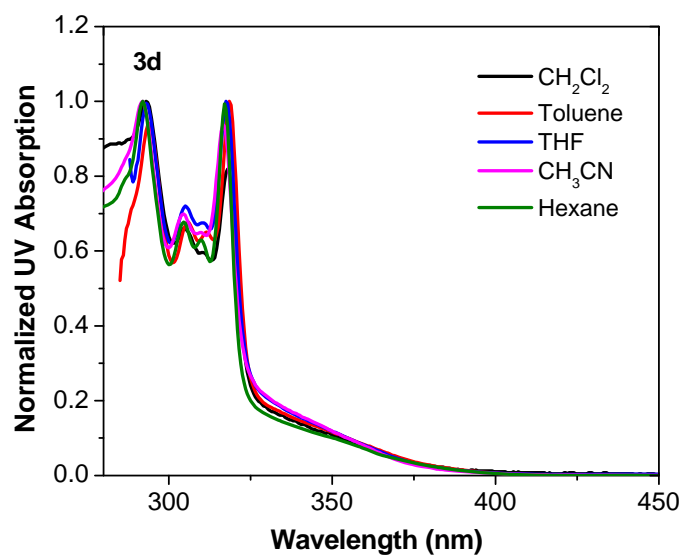

**Figure S9.** Normalized UV-Vis absorption spectra of **3d** in different solvents.  $A_{365} = 0.08$

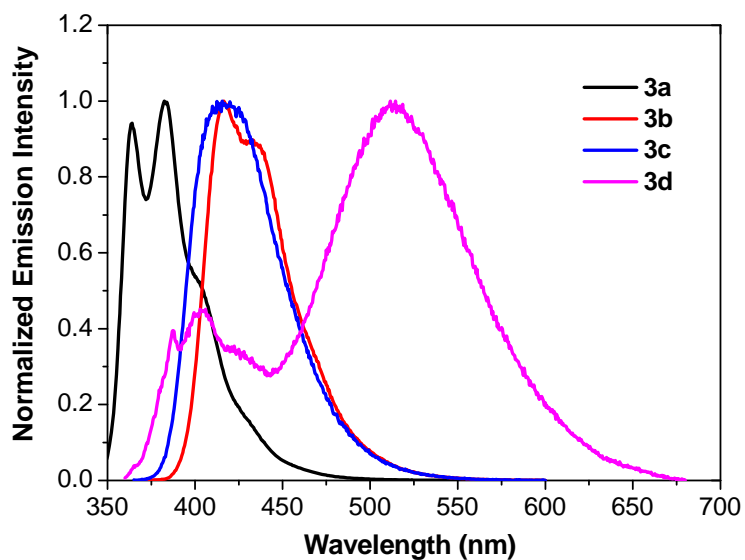

**Figure S10.** Normalized emission spectra of ligands **3a**,  $\lambda_{\text{ex}} = 335$  nm, **3b**,  $\lambda_{\text{ex}} = 350$  nm, **3c**,  $\lambda_{\text{ex}} = 355$  nm and **3d**,  $\lambda_{\text{ex}} = 345$  nm, in CH<sub>2</sub>Cl<sub>2</sub> ( $1 \times 10^{-5}$  mol·L<sup>-1</sup>).

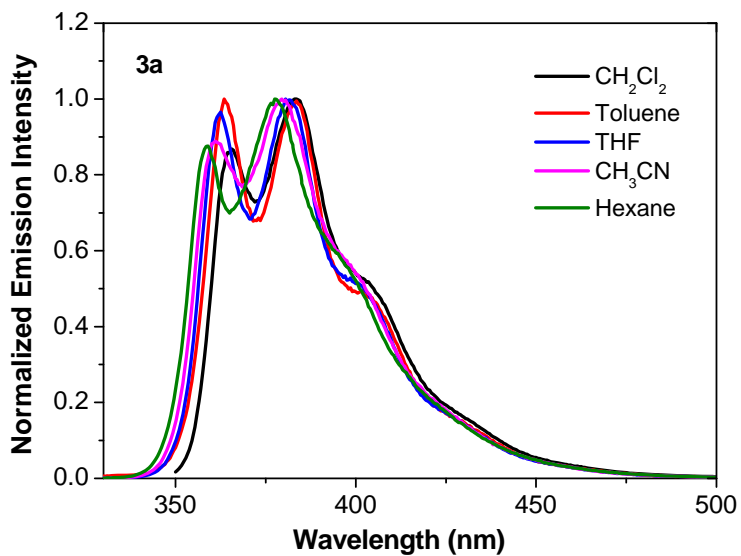

**Figure S11.** Normalized emission spectra of **3a** in different solvents at room temperature,  $\lambda_{\text{ex}} = 320$  nm.

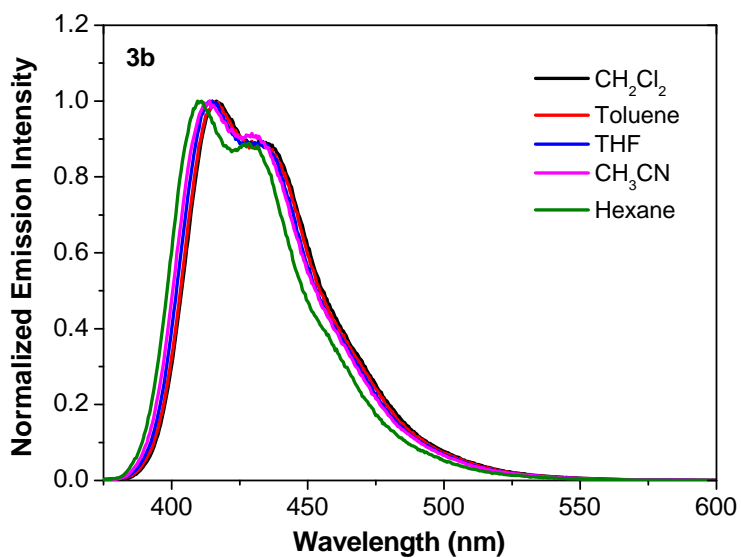

**Figure S12.** Normalized emission spectra of **3b** in different solvents at room temperature,  $\lambda_{\text{ex}} = 365$  nm.

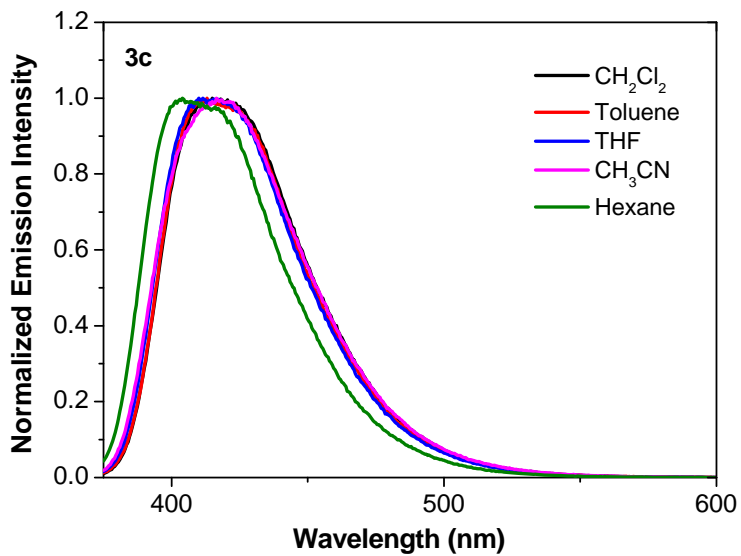

**Figure S13.** Normalized emission spectra of **3c** in different solvents at room temperature,  $\lambda_{\text{ex}} = 365$  nm.

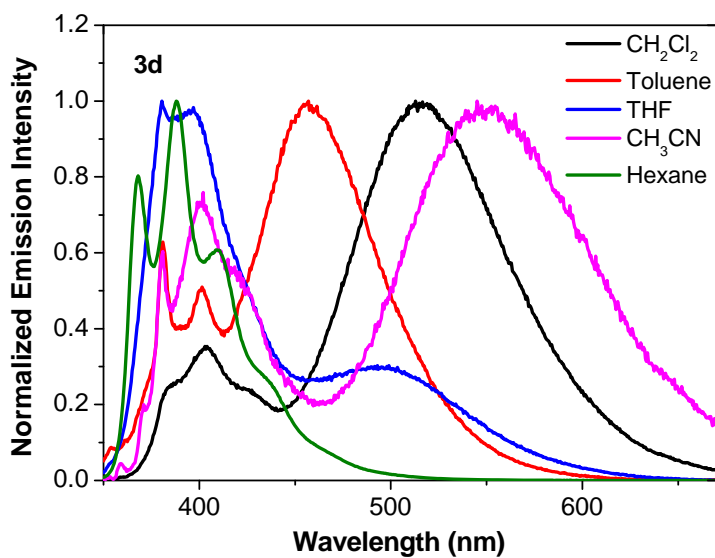

**Figure S14.** Normalized emission spectra of **3d** in different solvents at room temperature,  $\lambda_{\text{ex}} = 365 \text{ nm}$ .

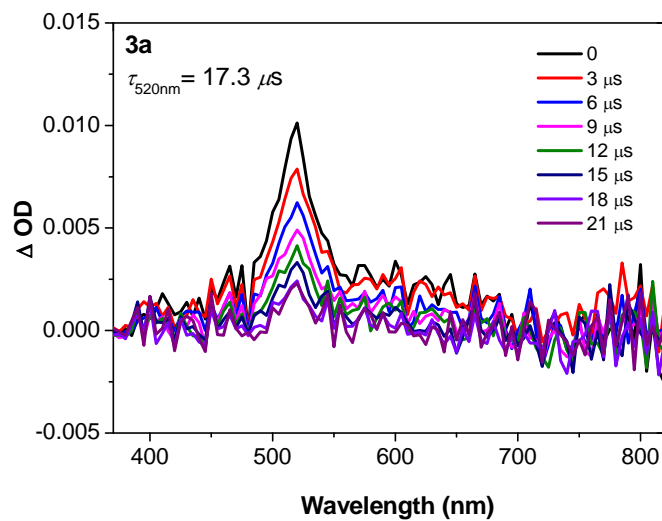

**Figure S15.** Time-resolved triplet transient difference absorption spectra of **3a** in toluene.  $\lambda_{\text{ex}} = 355 \text{ nm}$ .  $A = 0.4$  at 355 nm in a 1-cm cuvette.



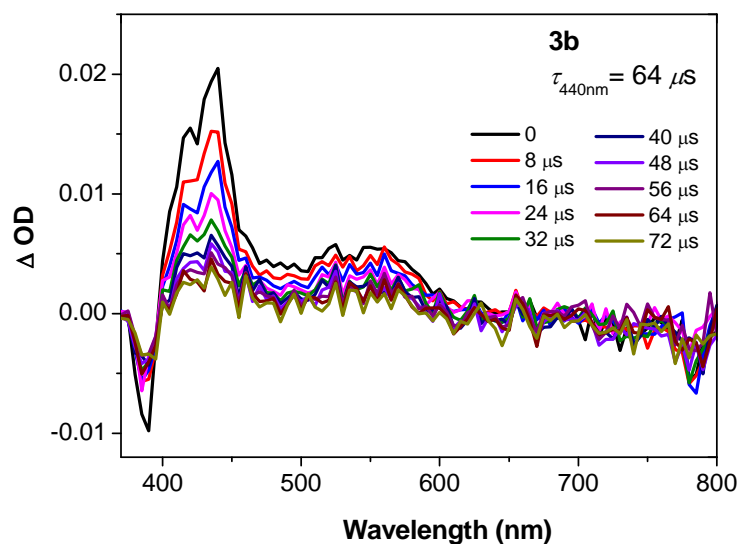

**Figure S16.** Time-resolved triplet transient difference absorption spectra of **3b** in toluene.  $\lambda_{\text{ex}} = 355 \text{ nm}$ .  $A = 0.4$  at 355 nm in a 1-cm cuvette.

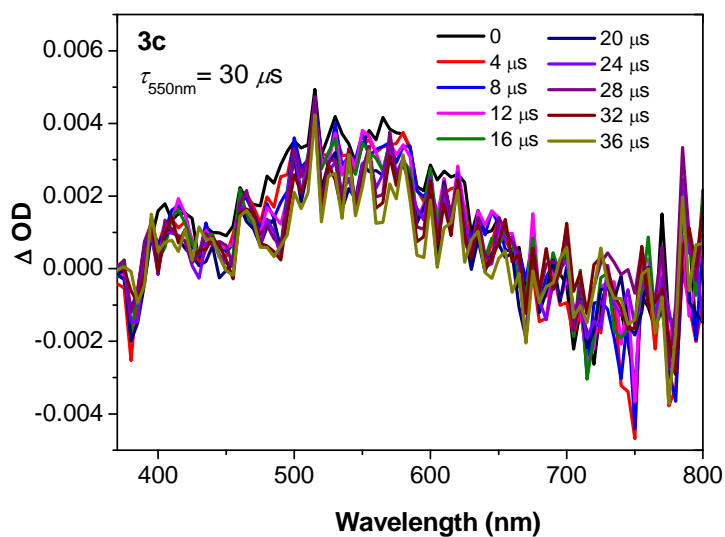

**Figure S17.** Time-resolved triplet transient difference absorption spectra of **3c** in toluene.  $\lambda_{\text{ex}} = 355 \text{ nm}$ .  $A = 0.4$  at 355 nm in a 1-cm cuvette.

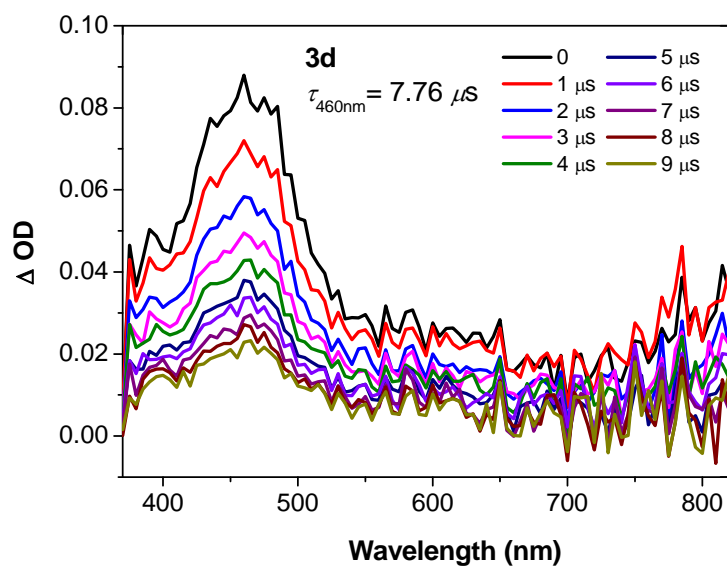

**Figure S18.** Time-resolved triplet transient difference absorption spectra of **3d** in toluene.  $\lambda_{\text{ex}} = 355 \text{ nm}$ .  $A = 0.4$  at 355 nm in a 1-cm cuvette.

**Table S1.** Optimized geometries of complexes **1a** – **1d**

| Complex   | Optimized geometries                                                                 |
|-----------|--------------------------------------------------------------------------------------|
| <b>1a</b> | 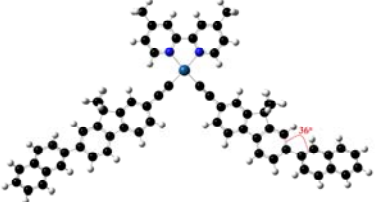   |
| <b>1b</b> |    |
| <b>1c</b> |   |
| <b>1d</b> |  |

**Table S2.** Schematic representation of the magnitude of the static dipole moments and directions of Pt(II) complexes **1a** – **1d** at their ground state and excited state.<sup>a</sup>

| Complex   | Ground State                                                                                                   | Excited State                                                                                                   |
|-----------|----------------------------------------------------------------------------------------------------------------|-----------------------------------------------------------------------------------------------------------------|
| <b>1a</b> | 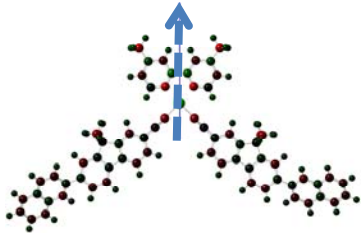<br>$\mu = 18.21 \text{ D}$   | <br>$\mu = 17.54 \text{ D}$   |
| <b>1b</b> | <br>$\mu = 18.40 \text{ D}$   | <br>$\mu = 5.89 \text{ D}$    |
| <b>1c</b> | <br>$\mu = 18.46 \text{ D}$  | <br>$\mu = 5.94 \text{ D}$   |
| <b>1d</b> | <br>$\mu = 21.72 \text{ D}$ | <br>$\mu = 21.40 \text{ D}$ |

<sup>a</sup> The different colors in the structure represent the Milliken charge density distributions, with the green color indicating positive charges and red color representing negative charges.

**Table S3** NTOs representing transitions corresponding to singlet emission ( $S_1$ ) of complexes **1a** - **1d** and triplet emission ( $T_1$ ) of the complex **1b** calculated using CAM-B3LYP functional.

| Excited State and Properties |                                      | HOLE                                                                                | ELECTRON                                                                              |
|------------------------------|--------------------------------------|-------------------------------------------------------------------------------------|---------------------------------------------------------------------------------------|
| <b>1a</b>                    | $S_1$<br>393 nm<br>$f_{o.s.} = 0.59$ |    |    |
| <b>1b</b>                    | $S_1$<br>390 nm<br>$f_{o.s.} = 0.44$ |    |    |
|                              | $T_1$<br>820 nm                      |   |   |
| <b>1c</b>                    | $S_1$<br>392 nm<br>$f_{o.s.} = 0.68$ |  |  |
| <b>1d</b>                    | $S_1$<br>385 nm<br>$f_{o.s.} = 0.37$ |  |  |
